# Supplementary material for: Humanization of pan-HLA-DR mAb 44H10 Hinges on Critical Residues in the Antibody Framework
Source: Preprints.org preprint supplement (doi:10.20944/preprints202405.1417.v1), 2024-05-22
Supplement: Supplementary file 1 [file Supplementary_Table_S3_submission.xlsx]

## Sheet: TableS3 - Xtal Stats
		V14 Fab	V17 Fab	V21 Fab	V22 Fab-HLA-DR
	Beamline	APS-23-ID-D	APS-23-ID-D	APS-23-ID-B	CLS-08ID-1
	Wavelength (Å)	1.0332	1.0332	1.03317	0.95357
	Space group	P3121	P21	P21	I222
	Cell dimensions
	a,b,c (Å)	123.3, 123.3, 90.7	36.9, 84.8, 64.8	36.7, 86.1, 67.4	169.6, 178.8, 178.4
	α, β, γ (°)	90, 90, 120	90, 106.4, 90	90, 105.7, 90	90, 90, 90
	Resolution (Å)a	40.0-2.48 (2.52-2.48)	40-1.95 (1.98-1.95)	40-1.73 (1.76-1.73)	47.6-3.08 (3.36-3.08)
	No. molecules in ASU	1	1	1	2
	No. observations	112,415 (5,221)	94,257 (2,374)	280,826 (14,137)	401,898 (16,971)
	No. unique observations	28,548 (1,351)	27,394 (1,054)	41,800 (2,076)	29,589 (1,974)
	Multiplicity	3.9 (3.9)	3.4 (2.0)	6.7 (6.8)	13.6 (13.7)
	Rmerge (%)b	18.8 (64.1)	9.4 (39.4)	11.7 (73.6)	47.5 (284)
	Rpim (%)c	10.8 (37.6)	5.6 (29.4)	4.9 (30.3)	13.4 (79.1)
	<I/σ I>	6.1 (1.5)	8.6 (1.7)	13.2 (1.7)	7.8 (1.46)
	CC½	97.7 (50.6)	99.3 (76.3)	99.6 (58.3)	97.7 (47.0)
	Completeness (spherical, %)	99.8 (99.6)	97.9 (86.8)	99.2 (99.1)	58.9 (17.3)
	Completeness (ellipsoidal, %)	N/A	N/A	N/A	93.0 (67.3)
	Refinement Statistics
	Reflections used in refinement	28513	27368	41767	29559
	Reflections used for R-free	1433	1376	2007	1494
	Non-hydrogen atoms	3563	3476	3572	12878
	Macromolecule	3305	3282	3262	12812
	Water	207	190	296	0
	Heteroatom	51	4	14	66
	Rworkd / Rfreee	17.4/20.5	17.9/22.3	17.5/21.2	20.0/23.7
	Rms deviations from ideality
	Bond lengths (Å)	0.007	0.003	0.009	0.004
	Bond angle (°)	0.88	0.66	0.93	0.81
	Ramachandran plot
	Favoured regions (%)	97	97.2	98.3	97.5
	Allowed regions (%)	3	2.8	1.7	2.5
	B-factors (Å2)
	Wilson B-value	36.2	30.8	25.6	72.3
	Average B-factors	39.6	37.8	35.3	77
	Average macromolecule	39.3	37.6	34.9	76.8
	Average heteroatom	53.6	46.7	45.3	113.5
	Average water molecule	41	40.5	39.3	N/A
	a Values in parentheses refer to the highest resolution bin.
	b Rmerge = Σhkl Σi | Ihkl, i - <Ihkl > | / Σhkl <Ihkl >
	c Rpim = Σhkl [1 / (N – 1)]1/2 Σi | Ihkl, i - <Ihkl > | / Σhkl <Ihkl >
	d Rwork = (Σ | |Fo | − |Fc | |) / (Σ | |Fo |) - for all data except as indicated in footnote e.
	e 5% of data were used for the Rfree calculation
