# Supplementary material for: Humanization of pan-HLA-DR mAb 44H10 Hinges on Critical Residues in the Antibody Framework
Source: Preprints.org preprint supplement (doi:10.20944/preprints202405.1417.v1), 2024-05-22
Supplement: Supplementary file 3 [file supplementary]

Archive with 10 entries (10 files):
- 9B75_V17Fab_Structure_Validation_Report.pdf
- __MACOSX/._9B75_V17Fab_Structure_Validation_Report.pdf
- 9B76_V21Fab_Structure_Validation_Report.pdf
- __MACOSX/._9B76_V21Fab_Structure_Validation_Report.pdf
- 9B74_V14Fab_Structure_Validation_Report.pdf
- __MACOSX/._9B74_V14Fab_Structure_Validation_Report.pdf
- 9B7B_V22Fab_HLADR_Structure_Validation_Report.pdf
- __MACOSX/._9B7B_V22Fab_HLADR_Structure_Validation_Report.pdf
- Supplementary_Table_S3_submission.xlsx
- __MACOSX/._Supplementary_Table_S3_submission.xlsx
